# Supplementary figures and images for: Differential Tolerance to Calonectria pseudonaviculata of English Boxwood Plants Associated with the Complexity of Culturable Fungal and Bacterial Endophyte Communities
Source: MDPI journal article supplement (doi:10.3390/plants10112244), 2021-10-21

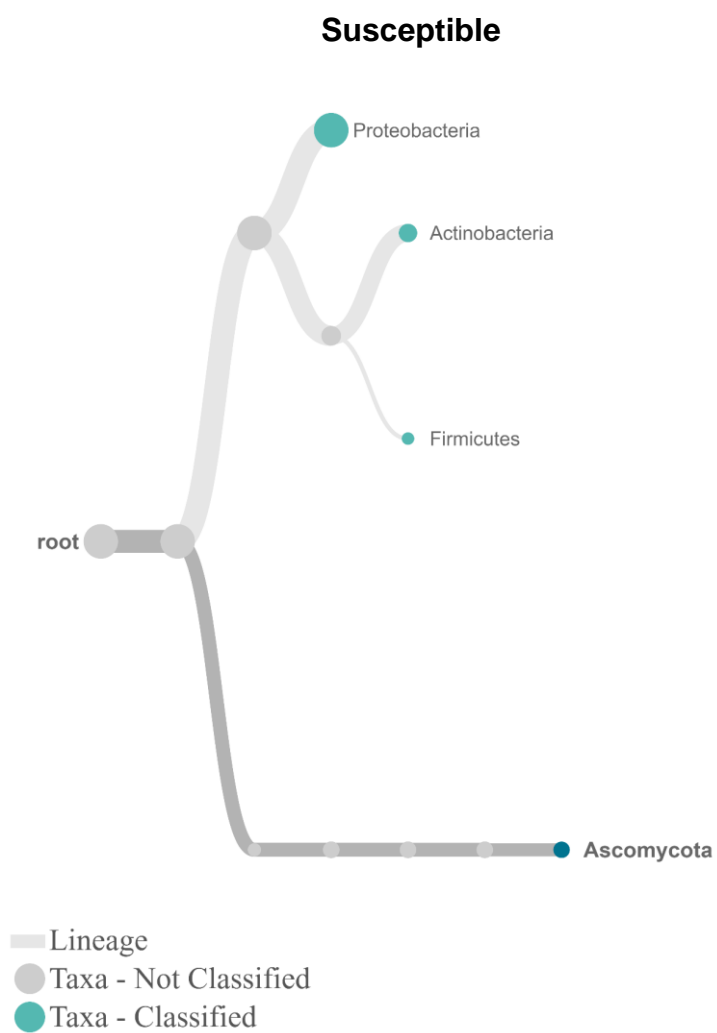

(a)

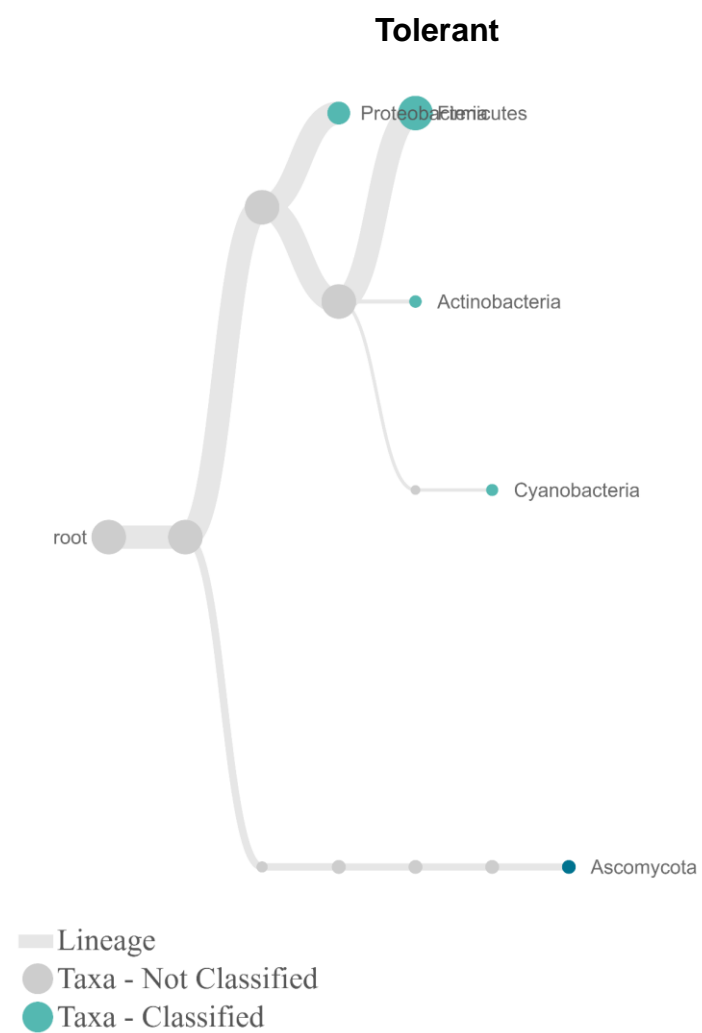

(b)

Supplement: s1 [file s1]

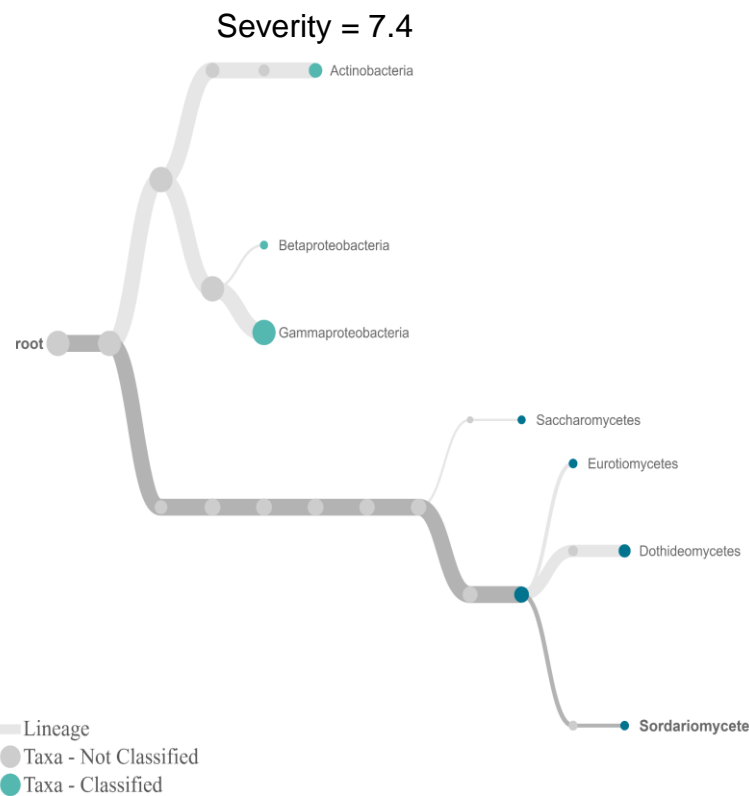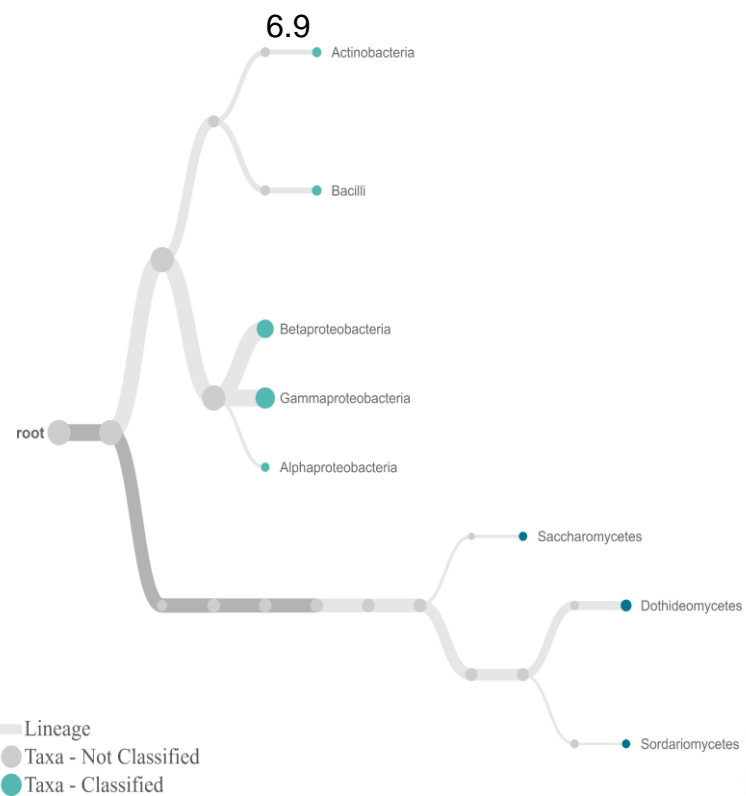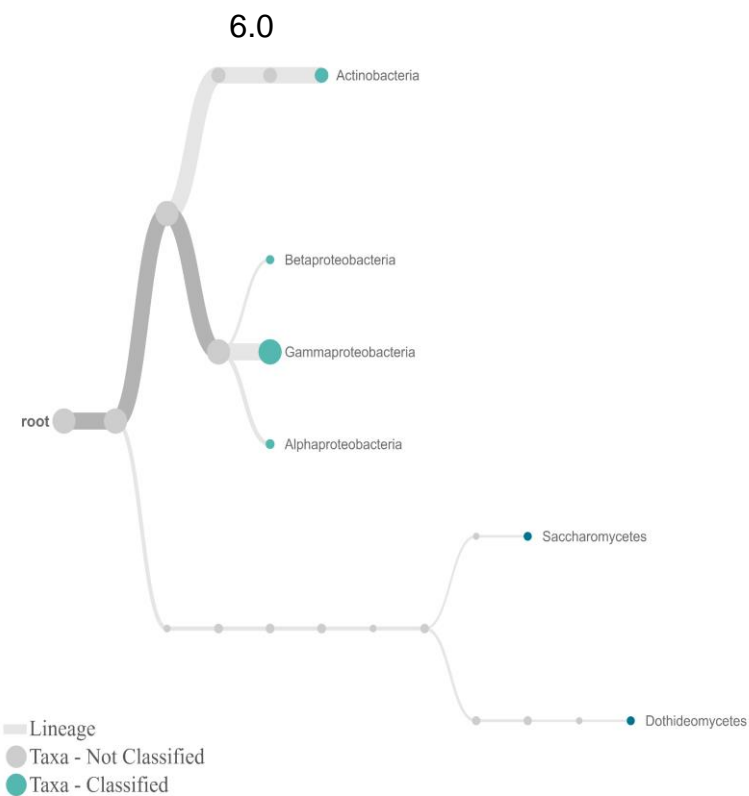

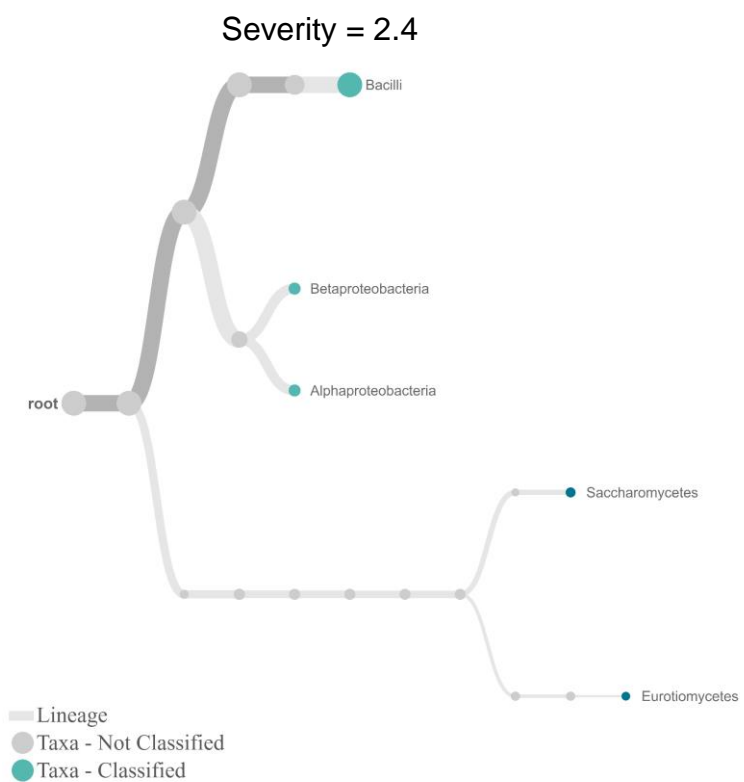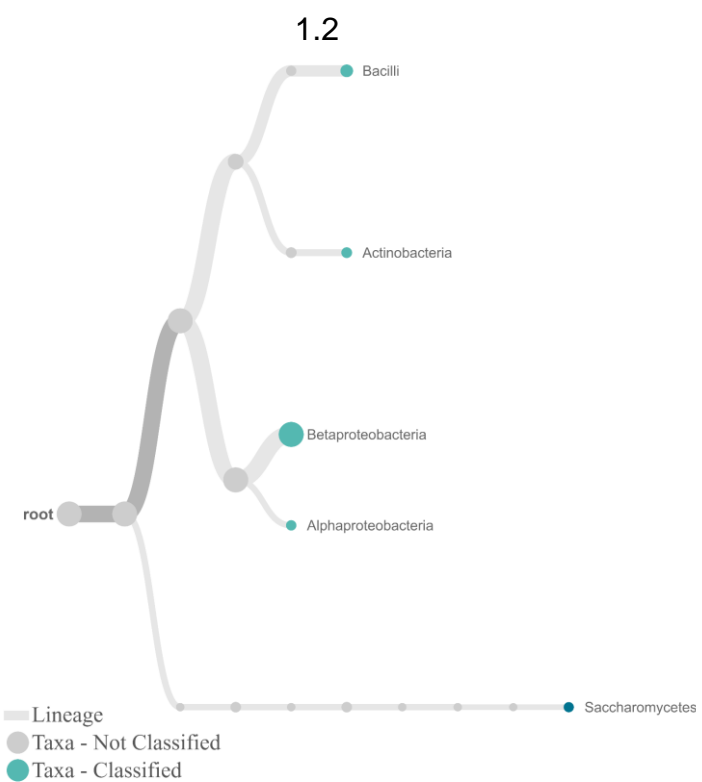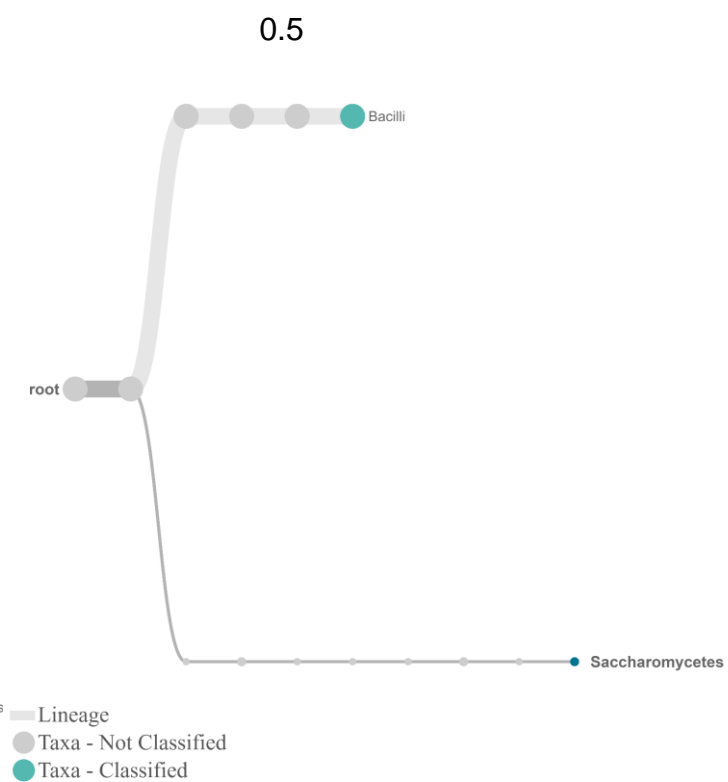

Supplement: s1 [file s1]
